1  
2  
3  
4  
5  
6  
7  
8  
9  
10  
11  
12  
13  
14  
15  
16  
17  
18  
19  
20  
21  
22  
23  
24  
25  
26  
27  
28  
29  
30  
31  
32  
33  
34  
35  
36  
37  
38  
39  
40  
41

**Diagnostic Accuracy of Simple Postoperative AKI Risk (SPARK)  
Classification and General Surgery AKI (GS AKI) Index  
in Predicting Postoperative Acute Kidney Injury  
among Patients Undergoing Non-Cardiac Surgery  
at a Tertiary Hospital in the Philippines**

**Michelle Wendy Teo<sup>1</sup>, Demi Sarah Robles<sup>2</sup>, Carlo Antonio Boado &<sup>3</sup>, Oscar Naidas &<sup>4</sup>**

<sup>1</sup>Department of Medicine, St. Luke's Medical Center, Quezon City, NCR, Philippines

<sup>3</sup>Section of Nephrology, St. Luke's Medical Center, Quezon City, NCR, Philippines

## 42 **Abstract**

43  
44 **Background:** Postoperative AKI is a significant postoperative complication. Clinical risk  
45 prediction models are lacking for patients undergoing non-cardiac surgery. SPARK Classification  
46 and GS AKI Index are tools that have shown fair discriminative ability to predict post-operative  
47 AKI in non-cardiac surgery and have external validation in their original cohorts. There is no study  
48 that compares the diagnostic accuracy of both tools.

49 **Objectives:** This study aims to compare the diagnostic accuracy of SPARK Classification vs GS-  
50 AKI Risk Index in predicting post-operative AKI among patients who will undergo non-cardiac  
51 surgery at a tertiary hospital in the Philippines.

52 **Methods:** This is a cross-sectional study, including adult patients who underwent non-cardiac  
53 surgeries from January 2019 to July 2021. The individual risk of post-operative AKI for both  
54 models were determined. Descriptive data was described using t-test and logistic regression.  
55 Measures of accuracy were described using sensitivity, specificity, positive and negative predictive  
56 value, positive and negative likelihood ratio, and discriminative ability using concordance (c)  
57 statistic.

58 **Results:** Of the 340 patients in this study, 77 (22.65%) developed post-operative AKI and 24  
59 (7.06%) developed critical AKI. Based on demographic data, older age, pre-existing renal disease,  
60 longer duration of surgery, anemia, hypoalbuminemia, and hyponatremia were associated with  
61 higher incidence of post-operative AKI. SPARK had a sensitivity ranging from 17-43% and  
62 specificity ranging from 58-93% for Class B to C. GS AKI had a sensitivity ranging from 10-26%  
63 and specificity ranging from 61-97% for Class I to V. SPARK had a discriminative power (c  
64 statistic) ranging from 0.46 to 0.61 while GS AKI had a discriminative power ranging from 0.41  
65 to 0.54.

66  
67  
68  
69  
70  
71  
72  
73  
74  
75  
76  
77  
78  
79  
80  
81  
82  
83  
84  
85  
86  
87  
88  
89  
90  
91  
92  
93  
94  
95  
96  
97  
98  
99  
100  
101  
102  
103  
104  
105

**Conclusion:** Based on this study, there is an association between higher risk classification in both SPARK and GS AKI and postoperative AKI. However, both clinical prediction models demonstrate poor discriminative power to predict post-operative AKI.

**Keywords:** Post-operative AKI, SPARK, General Surgery AKI, clinical prognostic model

## 106 **Introduction**

107  
108 Postoperative Acute Kidney Injury (AKI) is an undesired complication in surgical patients of  
109 variable outcome. Strategies to prevent AKI using practical, externally validated risk prediction  
110 indices are integral to both identification of at-risk patients prior to surgery and their subsequent  
111 management of post-surgery. Among developed prediction tools, many have been validated to  
112 accurately predict post-operative AKI in cardiac surgeries, however these are lacking for non-  
113 cardiac surgeries. A common risk prediction tool that we use is the General Surgery AKI Risk  
114 Index developed by Kheterpal et al.[1] with good discriminative ability. The SPARK  
115 Classification developed by Park et al.[2] is a new risk prediction tool that includes more variables  
116 in its model than GS AKI, and further classifies outcomes as critical AKI, which they defined as  
117 AKI stage 2 as defined by KDIGO, AKI requiring renal replacement therapy, and AKI leading to  
118 death. This risk prediction model has limited generalizability because it was only validated in the  
119 Korean population. There is a need to validate this test in the local setting. If proven to be more  
120 specific and sensitive than GS-AKI Risk Index, the SPARK Classification could replace GS AKI  
121 as the standard tool to predict the risk of postoperative AKI.

122

## 123 **Review of Related Literature**

124 **Epidemiology of AKI in Non-cardiac Surgical Patients**

125 Acute kidney injury (AKI) is characterized by a sudden decrease in renal function from injury to  
126 the kidneys. The diagnosis of AKI is based on the Kidney Disease Improving Global Outcomes  
127 (KDIGO) criteria defined by increase in serum creatinine or decrease in urine output.[3]

128

129 Acute kidney injury is a common complication associated morbidity and risk for mortality. AKI  
130 has diverse etiologies and early detection and diagnosis is paramount to early treatment and  
131 reversal. The estimated global burden of AKI was 31% in Southeast Asia and the pooled mortality  
132 of AKI was 13.8%[4]. This indicates that the numbers reveal an enormous medical burden in the  
133 region.

134 AKI was found to be prevalent in both general hospital and intensive care unit settings. In the  
135 region, male predominance is observed at 55-75% and was associated with chronic comorbid  
136 conditions such as hypertension, diabetes and chronic kidney disease.[4]

137 The most common cause of AKI is sepsis and closely in second is surgery. Postoperative-AKI  
138 (PO-AKI) is defined as AKI within seven days of surgery. AKI occurring more than seven days  
139 after surgery are not necessarily related to the surgery itself hence should be managed as hospital-  
140 acquired AKI.[5]

141 The incidence of AKI in patients undergoing cardiac surgery is estimated to be at 42% depending  
142 on the complexity of the surgery and use of bypass.[6] In cases of abdominal surgery, rates are  
143 noted to be up to 13% and the risk is noted to be increased depending on additional patient-related  
144 risk factors for development of AKI like chronic vascular disease, chronic kidney disease, arterial  
145 hypertension, cardiac failure, and diabetes.[7] In comparison, AKI is seen in after orthopedic  
146 (6.7%), thoracic (12.1%), vascular surgery(9.3%), and urologic surgeries (8.6%).[8]

147 Among the causes of AKI, the leading cause of in-hospital AKI was renal hypoperfusion and  
148 nephrotoxic agents. In Southeast Asia, community acquired AKI contributes more to the burden  
149 of illness. The exact cause of CA-AKI was not studied in the SEA but among neighboring  
150 countries, the most common cause were infectious diseases (including leptospirosis) and sepsis.

151

152 In a study involving 110 Filipino patients aiming to describe the clinical profile and risk factors  
153 for mortality of patients with acute renal failure, the overall mortality rate was 14% with most  
154 deaths occurring on the first week of confinement. AKI in the study was associated with older age,  
155 male gender, and the presence of comorbid illness. The most common cause of AKI was noted to  
156 be infections such as leptospirosis and decreased renal perfusion.[9]

157 Risk assessment is an essential step to mobilize interventional strategies to minimize further renal  
158 injury. The non-recognition rate of AKI ranges has a high rate resulting in delay in nephrology  
159 referral and was shown to increase mortality rates, HD dependence and hospital stay.

160

#### 161 Outcomes of AKI in Surgical Patients

162 A number of studies showed that AKI had negative impact on outcomes of surgical patients which  
163 included increased mortality, healthcare cost, longer hospital stay and increased likelihood of  
164 dialysis dependence. Several studies showed that increase in creatinine alone was not the sole  
165 cause of poor outcomes in surgical patients with AKI. Among surgical patients, the systemic  
166 multifactorial pathophysiology causing organ dysfunction is central in postoperative AKI. [10]

167 Those who develop AKI may have consequences after hospitalization, with greater risk of  
168 developing CKD and higher incidence of long-term mortality. Chronic inflammation,  
169 transformation of pericytes into myofibroblasts in response to injury, and build-up of extracellular  
170 matrix leading to permanent scarring and changes in renal function.[11]

171

#### 172 Pathophysiology and Diagnosis of AKI in Non-cardiac Surgery Patients

173 Perioperative AKI is multifactorial and is commonly precipitated by several insults which most  
174 commonly involves hypoperfusion and inflammation. Hypovolemia during surgery may develop

175 at intra-operatively or post-operatively which reduced the mean arterial pressure reducing renal  
176 blood flow. Persistent hypotension results into a decrease in glomerular filtration rate secondary  
177 to afferent and efferent vasoconstriction above the effects of ADH and Angiotensin II. Systemic  
178 inflammatory reaction from the surgery results into tubular dysfunction and injury causing AKI.  
179 Tubular damage is caused by microcirculatory dysfunction, leukocyte migration, and endothelial  
180 dysfunction.[12]

181

## 182 Risk Factors to Development of AKI

183 A multitude of risk factors were identified to contribute to the development of AKI in patients  
184 undergoing non-cardiac surgery. These risk factors are divided into patient- and surgical-related  
185 factors. Table 1 describes the multiple risk factors for postoperative AKI.

186 Chronic diseases like CKD, chronic obstructive pulmonary disease, and diabetes are well  
187 established risk factors in the development of AKI. Other factors include obesity which increases  
188 the odds to develop AKI by 26.5% per 5 kg/m<sup>2</sup> BMI. Use of nephrotoxic agents like antibiotics,  
189 non-steroidal anti-inflammatory medications also increase the risk. Other comorbidities are  
190 important because these patients may have creatinine values within the normal range but decreased  
191 GFRs.[6] In these patients, it is conceivable that less serious insults might have more detrimental  
192 effects as in patients without comorbidities. Hemodynamic alterations such as prolonged periods  
193 of hypotension and vasopressors also increase the risk of AKI. The type of surgery such as general,  
194 thoracic, orthopedic, vascular, and urological surgeries are further worth mentioning as an  
195 association with the development of AKI has been described.[13]

196 The detection of patients at risk for AKI plays a pivotal role because these patients might  
197 particularly benefit from preventive strategies.

198

199 Table 1. Perioperative Risk Factors for Postoperative AKI (Modified from Molinari, L 2020)

| Pre-operative Factors                                                                                                                                                                                                                                                                                                                                                                                                                                                                                                                                                                               | Intraoperative Factors                                                                                                                                                                                                                                                                                                                                                                                    | Post operative Factors                                                                                                                                                                                                                                                                                                             |
|-----------------------------------------------------------------------------------------------------------------------------------------------------------------------------------------------------------------------------------------------------------------------------------------------------------------------------------------------------------------------------------------------------------------------------------------------------------------------------------------------------------------------------------------------------------------------------------------------------|-----------------------------------------------------------------------------------------------------------------------------------------------------------------------------------------------------------------------------------------------------------------------------------------------------------------------------------------------------------------------------------------------------------|------------------------------------------------------------------------------------------------------------------------------------------------------------------------------------------------------------------------------------------------------------------------------------------------------------------------------------|
| Preoperative<br>Preoperative hospital stay > 5d<br>Preoperative sepsis<br>Race<br>Male sex<br>Age<br>High ASA Status<br>High RCRI<br><br>Comorbidities<br>CKD<br>DMT2<br>COPD<br>Smoking<br>CHF and Hypertension<br>Arterial and venous vascular disease<br>CAD<br>Prior MI<br>Arterial fibrillation<br>Liver disease<br>Cancer<br>Bleeding disorders<br><br>Medications<br>Diuretics<br>NSAIDs<br>Nephrotoxic antibiotics<br>Steroids<br>Contrast agents<br>ACEi/ARBs<br><br>Pre-operative laboratory<br>eGFR reduction<br>Anemia<br>Hypoalbuminemia<br>High CRP<br>Acidosis HCO <sub>3</sub> < 22 | Emergent surgery<br>Laparotomy<br>Abdominal surgery<br>IAH<br>Longer duration of surgery<br>IV Contrast<br>Hemodynamic instability<br>Use of diuretics<br>Transfusion<br>Invasive Procedures<br><br>Vascular surgery<br>No use of cold renal perfusion<br>Open surgery<br>Anatomic complexity<br>Bleeding > 1L<br>Hemoglobin < 10 g/dL<br><br>Transplant surgery<br>Cirrhosis<br>CKD<br>Immunosuppression | Sepsis<br>Hemodynamic instability<br>Low cardiac output<br>Hypotension<br>Hypovolemia<br><br>Respiratory failure<br>Mechanical ventilation<br><br>Leak of anastomosis<br><br>Positive fluid balance within 48h<br>Transfusion<br>Use of diuretics<br>Use of vasopressor<br>Use of NSAIDs<br>Resumption of ACE 15 days post surgery |

200  
 201  
 202  
 203  
 204 Use of Clinical Prediction Scores  
 205  
 206 The use of clinical prediction scores for AKI is a frequent topic amongst nephrologists. There are  
 207 available validated prediction scores for AKI for patients undergoing cardiac surgery, non-cardiac  
 208 surgery, and orthopedic surgery. The most established are for cardiac surgery.  
 209



210 According to Lei, V et al.[14], existing clinical prediction rules for postoperative AKI provided  
211 only moderate levels of accuracy. These studies differ in their definitions of the AKI outcome, use  
212 of a mix of statistical and machine learning approaches, and have not uniformly focused on non-  
213 cardiac surgery.

214

#### 215 General Surgery Acute Kidney Injury (GS-AKI) Risk Index

216 The clinical tool developed by Kheterpal involving 75,952 non-cardiac operations in 2009 was  
217 derived from the database of outcomes from general surgery procedures performed in 121 medical  
218 centers in the US. The primary outcome of the study included AKI within 30 days, defined as an  
219 increase in serum creatinine of at least 2 mg/dl or dialysis requirement.[1] A list of pre-existing  
220 comorbidities and operative characteristics were evaluated as possible predictors of AKI. A  
221 logistic regression was used to create an AKI model. The study identified five risk factors: age  
222 >56 years, male sex, active congestive heart failure, ascites, hypertension, emergency surgery,  
223 intraperitoneal surgery, renal insufficiency - mild or moderate, and diabetes mellitus (oral or  
224 insulin therapy).

225 Table 2. Nine variables included in the General Surgery AKI Index. [1]  
226

| Risk Factors for GS-AKI                     |
|---------------------------------------------|
| Age greater than or equal to 56 years old   |
| Male sex                                    |
| Active congestive heart failure             |
| Ascites                                     |
| Hypertension                                |
| Emergency Surgery                           |
| Intraperitoneal Surgery                     |
| Renal insufficiency – mild or moderate      |
| Diabetes Mellitus – oral or insulin therapy |

227

228 After defining the risk factors for AKI, they categorized the patients according to the number of  
229 risk factors each patient has: class 1 (0-2 risk factors), class II (3 risk factors), class III (4 risk  
230 factors), class IV (5 risk factors), and class V (6+ risk factors). The incidence of AKI was  
231 determined for each class, which is 0.2%, 0.8%, 1.8%, 3.3%, and 8.9%, respectively. The  
232 corresponding hazards ratio of each class was determined with their corresponding p-value. The  
233 discriminative ability (c statistic) for a simplified risk index was 0.80 in the derivation and  
234 validation cohorts. Class V patients (six or more risk factors) had a 9% incidence of AKI. Overall,  
235 patients experiencing AKI had an eightfold increase in 30-day mortality.[15]

236

### 237 Simple Postoperative AKI Risk (SPARK) Classification

238 Recently, the development of a prediction tool addressed postoperative complications, including  
239 AKI across a range of surgical settings. The Simple Postoperative AKI Risk (SPARK)  
240 classification is a validated preoperative AKI risk score for non-cardiac surgery developed in South  
241 Korea, involving 51,041 patients and validated in 39,764 patients.[2] The classification used nine  
242 pre-operative variables: age, sex, baseline GFR, urinary albuminuria, expected surgery duration,  
243 emergency operation, diabetes mellitus, renin-angiotensin-aldosterone system blockade usage,  
244 hypoalbuminemia, anemia, and hyponatremia.

245

246 The SPARK risk score considers AKI severity by predicting a composite of adverse renal  
247 outcomes which included: development of stage 2 or greater AKI termed as “Critical AKI”, which  
248 was defined as either a need for RRT within 90 days of AKI or death occurring after any AKI  
249 diagnosis. The tool was developed to assist clinicians to discuss to patients the risk before surgery  
250 in a clear and definite quantification of risk and complications versus the benefits of the surgery.

251 Higher risk patients can also be put on intensive monitoring and interventions in the post-operative  
 252 period. This risk prediction model however has limited generalizability because it was only  
 253 validated in Korean population hence additional validation is required to test its applicability to  
 254 other populations. The discriminative power of the SPARK index was acceptable in both the  
 255 discovery (c-statistic 0.80) and validation (c-statistic 0.72) cohorts.

256 Table 3. Perioperative PO-AKI risk evaluation strategy on the basis of the suggested SPARK  
 257 classification. [2]

| Preoperative Risk Factors               | Scores |
|-----------------------------------------|--------|
| Age (years)                             |        |
| < 40                                    | 0      |
| > or equal to 40 and <60                | 6      |
| > or equal to 60 and <80                | 9      |
| > or equal to 80                        | 13     |
| eGFR (ml/Min per 1.73m <sup>2</sup> )   |        |
| > or equal to 60                        | 0      |
| > or equal to 45 and <60                | 8      |
| > or equal to 30 and <34                | 15     |
| > or equal to 15 and < 30               | 22     |
| Dipstick albuminuria (urine albumin +1) | 6      |
| Sex                                     |        |
| Female                                  | 0      |
| Male                                    | 8      |
| Expected surgical duration (hours)      | x 5    |
| Emergency operation                     | 7      |
| Diabetes Mellitus                       | 4      |
| RAAS Blockade                           | 6      |
| Hypoalbuminemia (< 3.5g/dL)             | 8      |
| Anemia (<12g/dL females, <13g/dL males) | 4      |
| Hyponatremia (<135mEq/L)                | 3      |

258

259 Web Based Prediction Model for AKI after Surgery

260 A recent study developed and validated a risk prediction tool for the occurrence of postoperative  
 261 AKI requiring RRT (AKI-dialysis). The study involved 2,299,502 surgical patients from the  
 262 American College of Surgeons National Surgical Quality Improvement Program Database (ACS

263 NSQIP) from 2015 to 2017. The model involved 11 predictors including: age, history of congestive  
264 heart failure, diabetes, ascites, emergency surgery, hypertension requiring medication,  
265 preoperative serum creatinine, hematocrit, sodium, preoperative sepsis, and surgery type. The risk  
266 model was developed using multivariable logistic regression. The AKI risk prediction model had  
267 high discriminative power for postoperative AKI-dialysis (c statistic training cohort: 0.89, c  
268 statistic test cohort: 0.90). The calculator provides only risk estimate and individual surgical  
269 outcome. [16]

270

## 271 **Study Objectives**

272 The aim of this study was to compare the accuracy of SPARK Classification vs GS-AKI Risk  
273 Index in predicting post-operative AKI among patients who will undergo noncardiac surgery at St.  
274 Luke's Medical Center - Quezon City.

275 In order to do this, we aimed to evaluate the accuracy in terms of sensitivity, specificity, predictive  
276 values, likelihood ratios, and to determine the ROC (c statistic) of the SPARK Classification and  
277 GS-AKI Risk Index in predicting postoperative AKI among patients who will undergo noncardiac  
278 surgery at SLMC – QC; to determine if there is a significant difference in the accuracy indices of  
279 the SPARK Classification and GS-AKI Risk Index in predicting postoperative AKI among patients  
280 who will undergo noncardiac surgery at SLMC – QC; and to present the clinical profile of patients  
281 referred for Nephrology risk stratification from year 2019 to 2021.

282

283

284

285

## 286 **Materials and Methods**

### 287 **Ethical Approval**

288 The Institutional Ethics Review Committee of St. Luke's Medical Center - Quezon City approved  
289 the study (EC Reference number: SL-20133). Informed consent was waived as the study was a  
290 cross-sectional study without medical intervention.

291

### 292 **Study Hospital and Study Design**

293 This was a cross-sectional study performed in St. Luke's Medical Center - Quezon City, which  
294 included adult (age  $\geq$  18 years) patients who underwent non-cardiac surgeries from January 2019  
295 to July 2021. The exclusion criteria were as follows: (1) cardiac surgeries, (2) ophthalmologic and  
296 dermatologic surgeries, (3) nephrectomy or kidney transplant recipients, (4) obstetric procedures,  
297 (5) minor procedures defined as surgery duration  $<$ 1 hour, (6) patients who were administered  
298 local anesthesia, (7) patients who had established or preoperative kidney dysfunction, defined as  
299 patients with CKD stage V or undergoing hemodialysis, and (8) patients with incomplete study  
300 variables found in medical record.

301

### 302 **Operational Definitions**

303 Table 4. Operational definitions.

|                                 | Definition                                                                                                                                                                                                                                            |
|---------------------------------|-------------------------------------------------------------------------------------------------------------------------------------------------------------------------------------------------------------------------------------------------------|
| Age                             | 56 years and older                                                                                                                                                                                                                                    |
| Sex                             | Male or female                                                                                                                                                                                                                                        |
| Active congestive heart failure | Abnormal exercise tolerance, orthopnea, increased JVP, Paroxysmal nocturnal dyspnea, pulmonary rales on physical examination, cardiomegaly, pulmonary vascular engorgement Noted in the medical record as congestive heart failure or pulmonary edema |

|                                             |                                                                                                                                                                                                                     |
|---------------------------------------------|---------------------------------------------------------------------------------------------------------------------------------------------------------------------------------------------------------------------|
| Ascites                                     | The presence of fluid accumulation in the peritoneal cavity noted on physical examination, abdominal ultrasound, or abdominal computed tomography or magnetic resonance imaging within 30 days before the operation |
| Hypertension                                | Persistent elevation of systolic blood pressure of >140mmHg or a diastolic blood pressure of > 90 mmHg or requires antihypertensive treatment at most within 30 days of being considered as a candidate for surgery |
| Emergency surgery                           | No later than 12 hours after the patient has been admitted to the hospital or after the onset of related preoperative symptomatology, OR if surgeon or anesthesiologist reported case as emergent                   |
| Intraperitoneal surgery                     | Incision reaches the peritoneum, excluding hernia repairs                                                                                                                                                           |
| Renal insufficiency - mild or moderate      | Mild renal insufficiency: serum creatinine 1.2 to 1.9mg/dL Moderate renal insufficiency: serum creatinine of 2.0 mg/dL or greater                                                                                   |
| Diabetes mellitus - oral or insulin therapy | 2 categories: DM necessitating oral hypoglycemic therapy OR DM necessitating insulin therapy                                                                                                                        |
| Dipstick albuminuria                        | Presence or absence of urine albumin greater than or equal to 1+                                                                                                                                                    |
| Hypoalbuminemia                             | Serum albumin less than 3.5g/dL                                                                                                                                                                                     |
| Anemia                                      | Hemoglobin < 12g/dL in females or <13g/dL for males                                                                                                                                                                 |
| Hyponatremia                                | Serum sodium less than 135 mEq/L                                                                                                                                                                                    |

304

## 305 Study Procedure

306 Patients who underwent non-cardiac surgery were identified from the general surgery census of  
307 St. Luke's Medical Center - Quezon City starting January 2019 to July 2021. The medical records  
308 were reviewed for eligibility into this study. The following data were extracted: age, sex, active  
309 congestive heart failure, hypertension, diabetes mellitus, use of ACE/ARBs, surgical procedure,  
310 expected surgical duration, reported as emergency operation, serum creatinine, hemoglobin, serum  
311 albumin, urinalysis, presence of ascites, postoperative serum creatinine, incidence of new onset

312 renal replacement therapy, and death. Charts with incomplete data were excluded. Preoperative  
313 data were extracted from the medical records, and both SPARK and GS AKI were applied to every  
314 patient. The postoperative outcomes were extracted from the same records.

315

## 316 **Study Outcome**

317 A post-operative AKI event was defined as AKI occurring within 7 days of an operative  
318 intervention using the KDIGO definition of AKI (defined as any of the following: (1) increase in  
319 serum creatinine by  $\geq 0.3\text{mg/dL}$  within 48 hours, (2) increase in serum creatinine to  $\geq 1.5$  times  
320 baseline occurring within 7 days, or (3) urine volume  $<0.5\text{ml/kg/h}$  for 6 hours). To enhance the  
321 clinical use of the study findings, we grouped the outcomes into two categories: low risk to  
322 intermediate risk AKI (SPARK Class A and B, GS AKI Class I to IV) and high risk AKI (SPARK  
323 Class C and D, GS AKI Class V). Among patients who developed post-operative AKI, critical  
324 AKI was defined as AKI stage  $\geq 2$  and AKI that led to post-AKI death or dialysis within 90 days.

325

## 326 **Study Sampling and Sample Size**

327 Both GS-AKI and SPARK have Area under curve (c discrimination) of 0.80 based on the study of  
328 Kheterpal (2009) and Park (2019). Thus in order to compare the two tools, as assumption of a  
329 difference of 0.15 in their AUC and ratio of 10 (based on 13.2% incidence of AKI on the study of  
330 Cheng), the minimum sample size required is at least 31 patients with AKI and 310 without AKI.  
331 This is based on 95% confidence level and 80% power of test.

332

333

## 334 **Data Analysis**

335 The study demographics and perioperative characteristics were summarized using descriptive  
336 statistics. Categorical data was expressed as frequency and proportions, while continuous data was  
337 expressed as mean. For bivariate analysis, a two-tailed t test was used to compare the differences  
338 between means of two groups. The variables that were identified from SPARK and GS AKI were  
339 put into a univariate binary logistic regression model between the dependent and independent  
340 variables, and were compared using odds ratio. The accuracy indices for both SPARK and GS AKI  
341 were computed and expressed as sensitivity, specificity, positive predictive value, negative  
342 predictive value, positive and negative likelihood ratio. The discriminative ability of both models  
343 were measured using the concordance statistic (c statistic) and presented under the Receiver  
344 Operating Characteristic (ROC) curve.

345  
346

## 347 **Results**

348 The demographic, clinical, and surgical profiles of the respondents according to post-operative  
349 AKI status can be found on Table 3. It can be noted that those who developed post-operative AKI  
350 had a mean age of 68.14 years old (SD=12.84), while those who did not develop post-operative  
351 AKI had a mean age of 58.49 years old (SD=14.89). Comparative analysis indicated that the mean  
352 age of those who developed post-operative AKI was significantly higher ( $t=-5.18$ ,  $p=0.001$ ).  
353 Results also showed that majority of those who developed post-operative AKI were males  
354 (53.85%), had hypertension (56.41%), and had an estimated glomerular filtration rate (eGFR) of  
355 more than 60mL/min/1.73m<sup>2</sup> (66.67%). It is also notable that among those who developed post-  
356 operative AKI, 7.69% had congestive heart failure, 33.33% had diabetes mellitus, 26.92% used  
357 ACE or ARB medications, and 5.19% had ascites. In contrast, among those who did not develop



358 post-operative AKI, 56.27% were females, 13.69% had pre-existing renal disorders, 80.23% had  
 359 an eGFR of more than 60mL/min/1.73m<sup>2</sup>, 5.32% had congestive heart failure, 47.91% had  
 360 hypertension, 27.00% had diabetes mellitus, 23.57% used ARB or ACE medications, and 5.13%  
 361 had ascites. Comparative analyses indicated no significant difference in these characteristics  
 362 between those who developed and did not develop post-operative AKI (p>0.05), except for  
 363 existing renal diseases ( $\chi^2=3.92$ , p=0.048).

364

**Table 5.**  
**Demographic, Clinical, and Surgical Profiles of the Respondents according to Post-Operative Acute Kidney Injury (AKI) Status (N = 340)**

| Characteristics                                                         | Post-Operative Acute Kidney Injury (AKI) Status |                                      |                 | Test Statistic     | p-value (Two-Tailed) |
|-------------------------------------------------------------------------|-------------------------------------------------|--------------------------------------|-----------------|--------------------|----------------------|
|                                                                         | With Post-Operative AKI (n = 78)                | Without Post-Operative AKI (n = 262) | Total (N = 340) |                    |                      |
| Age ( $\bar{x}$ , SD)                                                   | 68.14 (12.84)                                   | 58.49 (14.89)                        | 60.73 (14.97)   | -5.18 <sup>†</sup> | 0.001                |
| Sex (f, %)                                                              |                                                 |                                      |                 | 2.56               | 0.108                |
| Female                                                                  | 36 (46.15%)                                     | 114 (43.51%)                         | 184 (54.12%)    |                    |                      |
| Male                                                                    | 42 (53.85%)                                     | 148 (56.49%)                         | 156 (45.88%)    |                    |                      |
| <b>Clinical Data</b>                                                    |                                                 |                                      |                 |                    |                      |
| Pre-Existing Renal Disease (f, %)                                       | 18 (23.08%)                                     | 36 (13.74%)                          | 54 (15.88%)     | 3.92*              | 0.048                |
| Estimated Glomerular Filtration Rate (mL/min/1.73m <sup>2</sup> ; f, %) |                                                 |                                      |                 | 9.37*              | 0.024                |
| <15                                                                     | 0 (0.00%)                                       | 0 (0.00%)                            | 0 (0.00%)       |                    |                      |
| >15 to <30                                                              | 3 (3.85%)                                       | 11 (4.20%)                           | 14 (4.12%)      |                    |                      |
| >30 to <45                                                              | 8 (10.26%)                                      | 15 (5.73%)                           | 23 (6.76%)      |                    |                      |
| >45 to <60                                                              | 15 (19.23%)                                     | 23 (8.78%)                           | 38 (11.18%)     |                    |                      |
| >60                                                                     | 52 (66.67%)                                     | 213 (81.30%)                         | 264 (77.65%)    |                    |                      |
| Congestive Heart Failure (f, %)                                         | 6 (7.69%)                                       | 14 (5.34%)                           | 20 (5.88%)      | 0.60               | 0.439                |
| Hypertension (f, %)                                                     | 44 (56.41%)                                     | 125 (47.71%)                         | 169 (49.71%)    | 1.82               | 0.177                |
| Diabetes Mellitus (f, %)                                                | 26 (33.33%)                                     | 71 (27.10%)                          | 97 (28.53%)     | 1.15               | 0.284                |
| Use of ACE or ARB Medications (f, %)                                    | 21 (26.92%)                                     | 61 (23.28%)                          | 82 (24.12%)     | 0.44               | 0.509                |
| Presence of Ascites (f, %)                                              | 4 (5.13%)                                       | 12 (4.58%)                           | 16 (4.71%)      | 0.04               | 0.768                |
| <b>Surgical Characteristics</b>                                         |                                                 |                                      |                 |                    |                      |
| Duration of Surgery (Hours; $\bar{x}$ , SD)                             | 4.63 (3.10)                                     | 3.44 (2.51)                          | 3.71 (2.70)     | -3.49 <sup>†</sup> | 0.001                |
| Emergency Surgical Procedure (f, %)                                     | 2 (2.56%)                                       | 11 (4.20%)                           | 13 (3.82%)      | 0.41               | 0.740                |

\*Significant at 0.05

<sup>†</sup>Significant at 0.01

365

366 In terms of surgical characteristics, results indicated that the duration of surgery was significantly  
 367 longer (t=-3.49, p=0.001) among those who developed post-operative AKI ( $\bar{x}=4.63$ , SD=3.10)

368 than those who did not ( $\bar{x}=3.44$ ,  $SD=2.51$ ). Results also showed that the proportion of patients who  
 369 had emergency surgery and developed post-operative AKI (2.56%) was not significantly different  
 370 ( $\chi^2=0.41$ ,  $p=0.740$ ) from those who did not develop post-operative AKI (4.20%).

371  
 372 The pre-operative characteristics of the respondents according to post-operative AKI status is  
 373 presented in Table 6. It can be noted that the proportion of patients who had pre-operative anemia  
 374 was significantly higher ( $\chi^2=4.19$ ,  $p=0.027$ ) among those who developed post-operative AKI  
 375 (70.51%) than those who did not (56.49%). Similarly, the proportion of patients who had pre-  
 376 operative hypoalbuminemia was significantly higher ( $\chi^2=4.39$ ,  $p=0.036$ ) among those who had  
 377 post-operative AKI (78.21%). Results also indicated that the proportion of patients who had pre-  
 378 operative hyponatremia was significantly higher ( $\chi^2=4.91$ ,  $p=0.027$ ) among those who had post-  
 379 operative AKI (38.46%) than those who did not develop the post-operative outcome (25.19%).  
 380 Results showed that the proportion of patients with dipstick hypoalbuminemia and the mean pre-  
 381 operative serum creatinine was not statistically different between those who developed and did not  
 382 develop post-operative AKI ( $p>0.05$ ).

Table 6.  
 Pre-Operative Characteristics of the Respondents according to Post-Operative Acute Kidney Injury (AKI) Status (N = 340)

| Pre-Operative Characteristics      | Post-Operative Acute Kidney Injury (AKI) Status |                           |                                   | Test Statistic | p-value<br>(Two-Tailed) |       |
|------------------------------------|-------------------------------------------------|---------------------------|-----------------------------------|----------------|-------------------------|-------|
|                                    | With<br>Operative<br>(n = 78)                   | Post-<br>Operative<br>AKI | Without<br>Operative<br>(n = 262) |                |                         |       |
| Anemia (f, %)                      | 55 (70.51%)                                     |                           | 148 (56.49%)                      | 203 (59.71%)   | 4.91*                   | 0.027 |
| Hypoalbuminemia (f, %)             | 61 (78.21%)                                     |                           | 172 (65.65%)                      | 233 (68.53%)   | 4.39*                   | 0.036 |
| Dipstick Albuminemia (f, %)        | 32 (41.03%)                                     |                           | 85 (32.44%)                       | 117 (34.41%)   | 1.96                    | 0.161 |
| Hyponatremia (f, %)                | 30 (38.46%)                                     |                           | 66 (25.19%)                       | 96 (28.24%)    | 5.22*                   | 0.022 |
| Serum Creatinine ( $\bar{x}$ , SD) | 1.09 (0.52)                                     |                           | 1.02 (0.50)                       | 1.04 (0.50)    | -1.14                   | 0.256 |

\*Significant at 0.05

†Significant at 0.01

384  
 385 The post-operative outcomes of the respondents according to post-operative AKI status is depicted  
 386 in Table 7. It can be gleaned from the table that the proportion of patients who developed critical  
 387 AKI (30.77%), needed renal replacement therapy within 90 days (21.79%), and expired (21.79%)  
 388 was significantly higher ( $p < 0.05$ ) among those who had developed post-operative AKI. Likewise,  
 389 results showed that the mean post-operative serum creatinine was significantly higher ( $t = -13.38$ ,  
 390  $p = 0.001$ ) among those who had post-operative AKI than those who did not. Further, those who  
 391 had post-operative AKI showed a significant increase in post-operative creatinine, when compared  
 392 with pre-operative levels ( $t = -14.91$ ,  $p = 0.001$ ), with a mean percentage change of 83.88%  
 393 (SD=85.44%) than those who did not have post-operative AKI ( $\bar{x} = -2.69$ , SD=21.68).

Table 7.  
 Post-Operative Outcomes of the Respondents according to Post-Operative Acute Kidney Injury (AKI) Status (N = 340)

| Post-Operative Characteristics                                   | Post-Operative Acute Kidney Injury (AKI) Status |                                      |                 | Test Statistic | p-value (Two-Tailed) |
|------------------------------------------------------------------|-------------------------------------------------|--------------------------------------|-----------------|----------------|----------------------|
|                                                                  | With Post-Operative AKI (n = 78)                | Without Post-Operative AKI (n = 262) | Total (N = 340) |                |                      |
| Critical Acute Kidney Injury (KDIGO Stage II; f, %)              | 24 (30.77%)                                     | 0 (0.00%)                            | 24 (7.06%)      | 86.74†         | 0.001                |
| Need for Renal Replacement Therapy (RRT) within 90 Days (f, %)   | 17 (21.79%)                                     | 0 (0.00%)                            | 17 (5.00%)      | 60.11†         | 0.001                |
| Serum Creatinine (mg/dL; $\bar{x}$ , SD)                         | 1.86 (0.87)                                     | 0.94(0.38)                           | 1.15 (0.66)     | -13.38†        | 0.001                |
| Change in Serum Creatinine (%; $\bar{x}$ , SD)                   | 83.88 (85.44)                                   | -2.69 (21.68)                        | 17.17 (57.87)   | -14.91†        | 0.001                |
| Post-Operative Days until AKI Development (Days; $\bar{x}$ , SD) | 2.77 (4.41)                                     | -                                    | -               | -              | -                    |
| Death (f, %)                                                     | 17 (21.79%)                                     | 2 (0.76%)                            | 19 (5.59%)      | 50.39†         | 0.001                |

\*Significant at 0.05  
 †Significant at 0.01

394  
 395  
 396 Table 8 illustrates the AKI risk stratification using the Simple Postoperative AKI Risk (SPARK)  
 397 Classification and the General Surgery AKI (GS-AKI) Index among the respondents according to  
 398 post-operative AKI status. Results indicated that among those who developed post-operative AKI,

399 82.05% were categorized as high risk using the SPARK Classification and 10.26% were classified  
 400 as high risk using the GS-AKI index. Only 18.18% were of low to intermediate category using the  
 401 SPARK classification and 89.61% were considered low to intermediate risk using the GS-AKI  
 402 Index. Comparative analyses indicated that the proportion of patients classified as high risk was  
 403 significantly higher among those who developed post-operative AKI, in both the SPARK  
 404 Classification ( $\chi^2=14.37$ ,  $p=0.001$ ) and GS-AKI Index ( $\chi^2=8.44$ ,  $p=0.008$ ).

Table 8.  
 Frequency Distribution of the Acute Kidney Injury (AKI) Risk Stratification using the Simple Postoperative AKI Risk (SPARK) Classification and the General Surgery AKI (GS-AKI) Index among the Respondents according to Post-Operative Acute Kidney Injury (AKI) Status (N = 340)

| Risk Stratification                                  | Post-Operative Acute Kidney Injury (AKI) Status |                           |                                   |                           |                    | Test Statistic | p-value<br>(Two-Tailed) |
|------------------------------------------------------|-------------------------------------------------|---------------------------|-----------------------------------|---------------------------|--------------------|----------------|-------------------------|
|                                                      | With<br>Operative<br>(n = 77)                   | Post-<br>Operative<br>AKI | Without<br>Operative<br>(n = 263) | Post-<br>Operative<br>AKI | Total<br>(N = 340) |                |                         |
| Simple Postoperative AKI Risk (SPARK) Classification |                                                 |                           |                                   |                           |                    | 14.37†         | 0.001                   |
| Class A                                              | 0 (0.00%)                                       |                           | 16 (6.11%)                        |                           | 16 (4.71%)         |                |                         |
| Class B                                              | 14 (17.95%)                                     |                           | 95 (36.26%)                       |                           | 109 (32.06%)       |                |                         |
| Class C                                              | 34 (43.59%)                                     |                           | 110 (41.98%)                      |                           | 144 (42.35%)       |                |                         |
| Class D                                              | 30 (38.46%)                                     |                           | 41 (15.65%)                       |                           | 71 (20.88%)        |                |                         |
| General Surgery AKI (GS-AKI) Index                   |                                                 |                           |                                   |                           |                    | 8.44†          | 0.008                   |
| Class I                                              | 16 (20.78%)                                     |                           | 102 (38.93%)                      |                           | 118 (34.71%)       |                |                         |
| Class II                                             | 21 (26.92%)                                     |                           | 70 (26.72%)                       |                           | 91 (26.76%)        |                |                         |
| Class III                                            | 21 (26.92%)                                     |                           | 58 (22.14%)                       |                           | 79 (23.24%)        |                |                         |
| Class IV                                             | 12 (15.38%)                                     |                           | 25 (9.54%)                        |                           | 37 (10.88%)        |                |                         |
| Class V                                              | 8 (10.26%)                                      |                           | 7 (2.67%)                         |                           | 15 (4.41%)         |                |                         |

\*Significant at 0.05

†Significant at 0.01

405  
 406 The diagnostic capacity of the different categories of the Simple Postoperative AKI Risk (SPARK)  
 407 Classification and the General Surgery AKI (GS-AKI) Index are illustrated in Table 9 and Figure 1. Using  
 408 receiver operating characteristic (ROC) curve (Figure 4), it can be noted that the AUC-ROC of the different  
 409 classes of the SPARK Classification ranged from 40.80% to 61.40%, while the different categories of GS-  
 410 AKI Index had accuracy values, also known as c-statistic, ranging from 40.80% to 53.80%. The AUC-ROC  
 411 curve, which reflects the accuracy of the screening tool, is conventionally categorized into five: fail ( $\leq 0.60$ ),  
 412 poor (0.61 to 0.70), fair (0.71 to 0.80), good (0.81 to 0.90) and excellent ( $\geq 0.91$ ). Using these values, the

413 different classes of the SPARK Classification had a failure or poor diagnostic accuracy, while the different

414 GS-AKI classifications had failed to accurately screen post-operative AKI.

415

**Table 9.**  
**Diagnostic Properties [Accuracy, Sensitivity, Specificity, Positive Predictive Value (PPV), Negative Predictive Value (NPV), and Likelihood Ratios (LR)] of the Simple Postoperative AKI Risk (SPARK) Classification and the General Surgery AKI (GS-AKI) Index with Post-Operative Acute Kidney Injury (AKI) among the Respondents in Screening Post-Operative Acute Kidney Injury (AKI) among the Respondents (N = 340)**

| Risk Assessment Questionnaire Score Categories              | Post-Operative Acute Kidney Injury (AKI) |                             |                             |                             |                             |                        |                       |
|-------------------------------------------------------------|------------------------------------------|-----------------------------|-----------------------------|-----------------------------|-----------------------------|------------------------|-----------------------|
|                                                             | AUC-ROC (95% CI)                         | Sensitivity (95% CI)        | Specificity (95% CI)        | PPV (95% CI)                | NPV (95% CI)                | LR+ (95% CI)           | LR- (95% CI)          |
| <b>Simple Postoperative AKI Risk (SPARK) Classification</b> |                                          |                             |                             |                             |                             |                        |                       |
| Class A                                                     | 0.469<br>(0.455 – 0.484)                 | 0.00%<br>(0.00% – 4.62%)    | 93.90%<br>(90.30% – 96.50%) | 0.00%<br>(0.00% – 20.60%)   | 75.90%<br>(70.90% – 80.50%) | 0.00<br>(0.00 – 0.00)  | 1.07<br>(1.03 – 1.10) |
| Class B                                                     | 0.408<br>(0.357 – 0.460)                 | 17.90%<br>(10.20% – 28.30%) | 63.70%<br>(57.60% – 69.60%) | 12.80%<br>(7.20% – 20.60%)  | 72.30%<br>(66.00% – 78.00%) | 0.50<br>(0.30 – 0.82)  | 1.29<br>(1.12 – 1.48) |
| Class C                                                     | 0.508<br>(0.445 – 0.571)                 | 43.60%<br>(32.40% – 55.30%) | 58.00%<br>(51.80% – 64.10%) | 23.60%<br>(16.90% – 31.40%) | 77.60%<br>(71.10% – 83.20%) | 1.04<br>(0.78 – 1.39)  | 0.97<br>(0.78 – 1.21) |
| Class D                                                     | 0.614<br>(0.555 – 0.673)                 | 38.50%<br>(27.70% – 50.20%) | 84.40%<br>(79.40% – 88.50%) | 42.30%<br>(30.60% – 54.60%) | 82.20%<br>(77.00% – 86.50%) | 2.46<br>(1.65 – 3.66)  | 0.73<br>(0.61 – 0.88) |
| <b>General Surgery AKI (GS-AKI) Index</b>                   |                                          |                             |                             |                             |                             |                        |                       |
| Class I                                                     | 0.408<br>(0.354 – 0.462)                 | 20.50%<br>(12.20% – 31.20%) | 61.10%<br>(54.90% – 67.00%) | 13.60%<br>(7.95% – 21.10%)  | 72.10%<br>(65.70% – 77.90%) | 0.53<br>(0.33 – 0.84)  | 1.30<br>(1.12 – 1.51) |
| Class II                                                    | 0.501<br>(0.445 – 0.557)                 | 26.90%<br>(17.50% – 38.20%) | 73.30%<br>(67.50% – 78.50%) | 23.10%<br>(14.90% – 33.10%) | 77.10%<br>(71.40% – 82.20%) | 1.01<br>(0.66 – 1.53)  | 1.00<br>(0.86 – 1.16) |
| Class III                                                   | 0.524<br>(0.468 – 0.579)                 | 26.90%<br>(17.50% – 38.20%) | 77.90%<br>(72.30% – 82.70%) | 26.60%<br>(17.30% – 37.70%) | 78.20%<br>(72.70% – 83.00%) | 1.22<br>(0.79 – 1.87)  | 0.94<br>(0.81 – 1.09) |
| Class IV                                                    | 0.529<br>(0.485 – 0.573)                 | 15.40%<br>(8.21% – 25.30%)  | 90.50%<br>(86.20% – 93.70%) | 32.40%<br>(18.00% – 49.80%) | 78.20%<br>(73.10% – 82.70%) | 1.61<br>(0.85 – 3.06)  | 0.94<br>(0.84 – 1.04) |
| Class V                                                     | 0.538<br>(0.503 – 0.573)                 | 10.30%<br>(4.53% – 19.20%)  | 97.30%<br>(94.60% – 98.90%) | 53.30%<br>(26.60% – 78.70%) | 78.50%<br>(73.60% – 82.80%) | 3.84<br>(1.44 – 10.30) | 0.92<br>(0.85 – 1.00) |

\*Significant at 0.05

\*Significant at 0.01

416

417

418 Fig 1. Area Under the Receiver Operating Characteristic (AUC-ROC) of the different GS-AKI Categories (N = 340)

419

420

421 Fig 2. Area Under the Receiver Operating Characteristic (AUC-ROC) of the different SPARK Categories (N = 340)

422

423

424

425

426

427

## 428 **Discussion**

429 Our study was performed using data on patients undergoing surgical procedures in a single center  
430 spanning three years. Based on the demographic data, the patient characteristics significantly  
431 associated with incidence of postoperative AKI include older age, pre-existing renal disease,  
432 longer duration of surgery, anemia, hypoalbuminemia, and hyponatremia.

433 Compared with SPARK index validation cohort, our study population had an older mean age and  
434 had more comorbidities, notably hypertension, diabetes, pre-existing renal disease, and had more  
435 patients using RAAS blocking agents, longer mean duration of surgery, more patients with  
436 preoperative anemia, dipstick albuminuria, hypoalbuminemia, hyponatremia, and higher incidence  
437 of AKI.

438 An external validation study for SPARK index (NARA-AKI cohort study) was done by Nishimoto  
439 et al.[17] in 2021 in a single center in Nara Medical University Hospital in Japan. Among the 5135  
440 patients, 8.6% developed AKI. C statistic was 0.67 and 0.62 for AKI and critical AKI, respectively,  
441 which was similar to the results in our study. This population also had a higher mean age and  
442 presence of comorbidities compared to SPARK. Compared to this external validation, our study  
443 population had lower mean age. Our study also had higher incidence of hypertension and diabetes  
444 and had more patients with use of RAAS blockade, longer mean duration of surgery, anemia,  
445 hypoalbuminemia, dipstick albuminuria, and hyponatremia.

446 Compared with GS AKI, our study population had similar mean age, and proportion of  
447 hypertensive patients and with existing renal disease. Our study had higher rates of diabetes  
448 mellitus and congestive heart failure.

449 A local study was done by Doromal et al.[15] in 2016 in the University of Santo Tomas Hospital.  
450 The study included a total of 145 patients, with 59 patients who developed AKI. The c statistic

451 was determined to be 0.799. Prevalence of post-operative AKI was 41%. They divided the risk  
452 stratification into seven groups as compared to the two groups in our study, which could be the  
453 reason they yielded a higher c statistic. Similar to our study, this study demonstrated that age and  
454 high baseline eGFR are be associated with significantly higher incidence of post-operative AKI.  
455 In Table 4, this study demonstrates that the higher the class for both SPARK and GS AKI, the  
456 higher the incidence of postoperative AKI.

457 To the best of our knowledge, this is the first study to compare the accuracy of SPARK and GS  
458 AKI on the same population. Our results are the following: SPARK had a sensitivity ranging from  
459 17-43% and specificity ranging from 58-93% for Class B to C. GS AKI had a sensitivity ranging  
460 from 10-26% and specificity ranging from 61-97% for Class I to V. SPARK had a discriminative  
461 power (c statistic) ranging from 0.46 to 0.61 while GS AKI had a discriminative power ranging  
462 from 0.41 to 0.54. The c statistic is a simple method of determining if the model can accurately  
463 predict the outcome better than chance. Based on conventional cut-offs, the accuracy of both  
464 SPARK and GS AKI are fail. These are lower than the stated c statistics found in the original  
465 studies for both SPARK and GS AKI, which were stated to be 0.80, a good index. The difference  
466 could be due to several factors.

467 First, our data was collected from a single center with a limited sample size and number of AKI  
468 events. The prevalence of post-operative AKI was 22% in our study (N=340), 5.7% in SPARK  
469 cohort (N=90,805), 5.9% in NARA-AKI cohort (N=5135), and 1% in GS AKI cohort (N=56,519).  
470 Selection process is another factor that could have accounted for the differences of this study from  
471 the original SPARK and GS AKI studies. We excluded patients that did not fulfil the minimum  
472 data needed to determine the SPARK and GS AKI scores. Commonly unavailable data from our  
473 hospital database include serum albumin, urinalysis, and postoperative serum creatinine. These

474 laboratories are not routinely requested for all surgical patients in this institution. This method of  
475 convenience sampling may have caused an overestimation of the incidence of postoperative AKI  
476 in our study population.

477 There are several limitations to this study. It was performed in a small sample of patients, with  
478 even fewer patients who could be eligible in the study due to the extensive laboratory workup  
479 required by SPARK. Convenience sampling was used because of the limited number of eligible  
480 patients.

481

## 482 **Conclusion**

483 Based on our study, there is an association between higher risk classification in both SPARK and  
484 GS AKI and incidence of postoperative AKI. However, both clinical prediction models  
485 demonstrated poor measures of diagnostic accuracy such as sensitivity, specificity, PPV, and NPV,  
486 with a poor discriminative power to predict post-operative AKI in our study.

487

488

489

490

491

492

493

494

495

496

497

498

499

500

501

502

503

504



## 505 References

- 506 1. Kheterpal S, Tremper KK, Heung M, Rosenberg AL, Englesbe M, Shanks AM, et al.  
507 Development and validation of an acute kidney injury risk index for patients undergoing  
508 general surgery. *Anesthesiology*. 2009;110(3):505–15.
- 509 2. Park S, Cho H, Park S, Lee S, Kim K, Yoon HJ, et al. Simple postoperative aki risk  
510 (spark) classification before noncardiac surgery: A prediction index development study  
511 with external validation. *Journal of the American Society of Nephrology*.  
512 2018;30(1):170–81.
- 513 3. In: KDIGO clinical practice guideline for Acute Kidney Injury. New York, NY: Nature  
514 Publ. Group; 2012.
- 515 4. Yang L. Acute kidney injury in Asia. *Kidney Diseases*. 2016;2(3):95–102.
- 516 5. Prowle JR, Forni LG, Bell M, Chew MS, Edwards M, Grams ME, et al. Postoperative  
517 acute kidney injury in adult non-cardiac surgery: Joint Consensus Report of the acute  
518 disease quality initiative and Perioperative Quality initiative. *Nature Reviews*  
519 *Nephrology*. 2021;17(9):605–18.
- 520 6. Saadat-Gilani K, Zarbock A, Meersch M. Perioperative renoprotection: Clinical  
521 implications. *Anesthesia & Analgesia*. 2020;131(6):1667–78.
- 522 7. O'Connor ME, Kirwan CJ, Pearse RM, Prowle JR. Incidence and associations of acute  
523 kidney injury after major abdominal surgery. *Intensive Care Medicine*. 2015;42(4):521–  
524 30.
- 525 8. Grams ME, Sang Y, Coresh J, Ballew S, Matsushita K, Molnar MZ, et al. Acute kidney  
526 injury after major surgery: A retrospective analysis of veterans health administration data.  
527 *American Journal of Kidney Diseases*. 2016;67(6):872–80.
- 528 9. Dela Cruz CM, Pineda L, Rogelio G, Alano F. Clinical profile and factors affecting  
529 mortality in acute renal failure. *Renal Failure*. 1992;14(2):161–8.
- 530 10. Gameiro J, Fonseca JA, Neves M, Jorge S, Lopes JA. Acute kidney injury in major  
531 abdominal surgery: Incidence, risk factors, pathogenesis and outcomes. *Annals of*  
532 *Intensive Care*. 2018;8(1).
- 533 11. Ferenbach DA, Bonventre JV. Mechanisms of maladaptive repair after Aki leading to  
534 accelerated kidney ageing and CKD. *Nature Reviews Nephrology*. 2015;11(5):264–76.
- 535 12. Meersch M, Schmidt C, Zarbock A. Perioperative Acute Kidney Injury. *Anesthesia &*  
536 *Analgesia*. 2017;125(4):1223–32.
- 537 13. Molinari L, Sakhuja A, Kellum JA. Perioperative renoprotection: General Mechanisms  
538 and treatment approaches. *Anesthesia & Analgesia*. 2020;131(6):1679–92.
- 539 14. Lei VJ, Luong TB, Shan E, Chen X, Neuman MD, Eneanya ND, et al. Risk stratification  
540 for postoperative acute kidney injury in major noncardiac surgery using preoperative and  
541 intraoperative data. *JAMA Network Open*. 2019;2(12).
- 542 15. Doromal MA, Andres SC. The applicability of an acute kidney injury risk index for  
543 patients undergoing general surgery in a tertiary university setting. *Journal of Medicine,*  
544 *University of Santo Tomas*. 2019;3(2).
- 545 16. Woo SH, Zavodnick J, Ackermann L, Maarouf OH, Zhang J, Cowan SW. Development  
546 and validation of a web-based prediction model for Aki after surgery. *Kidney360*.  
547 2020;2(2):215–23.

- 548 17. Nishimoto M, Murashima M, Kokubu M, Matsui M, Eriguchi M, Samejima K-ichi, et al.  
549 External validation of a prediction model for acute kidney injury following noncardiac  
550 surgery. JAMA Network Open. 2021;4(10).

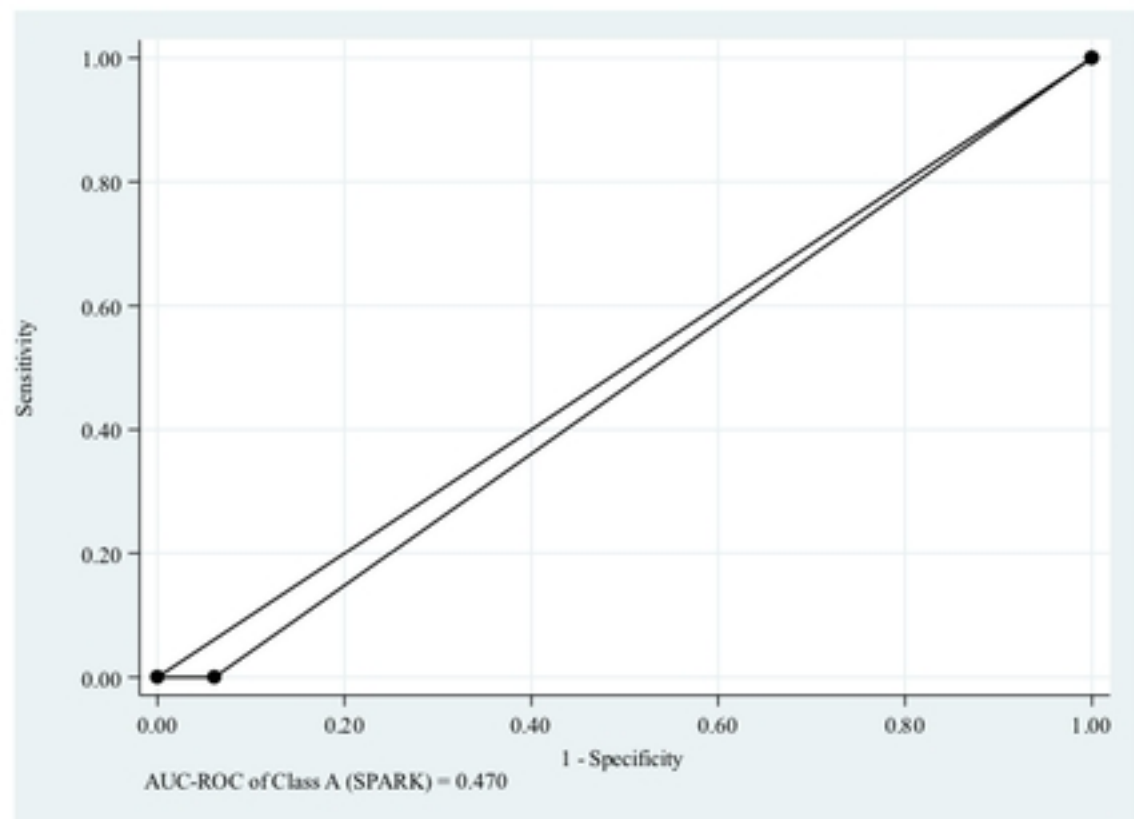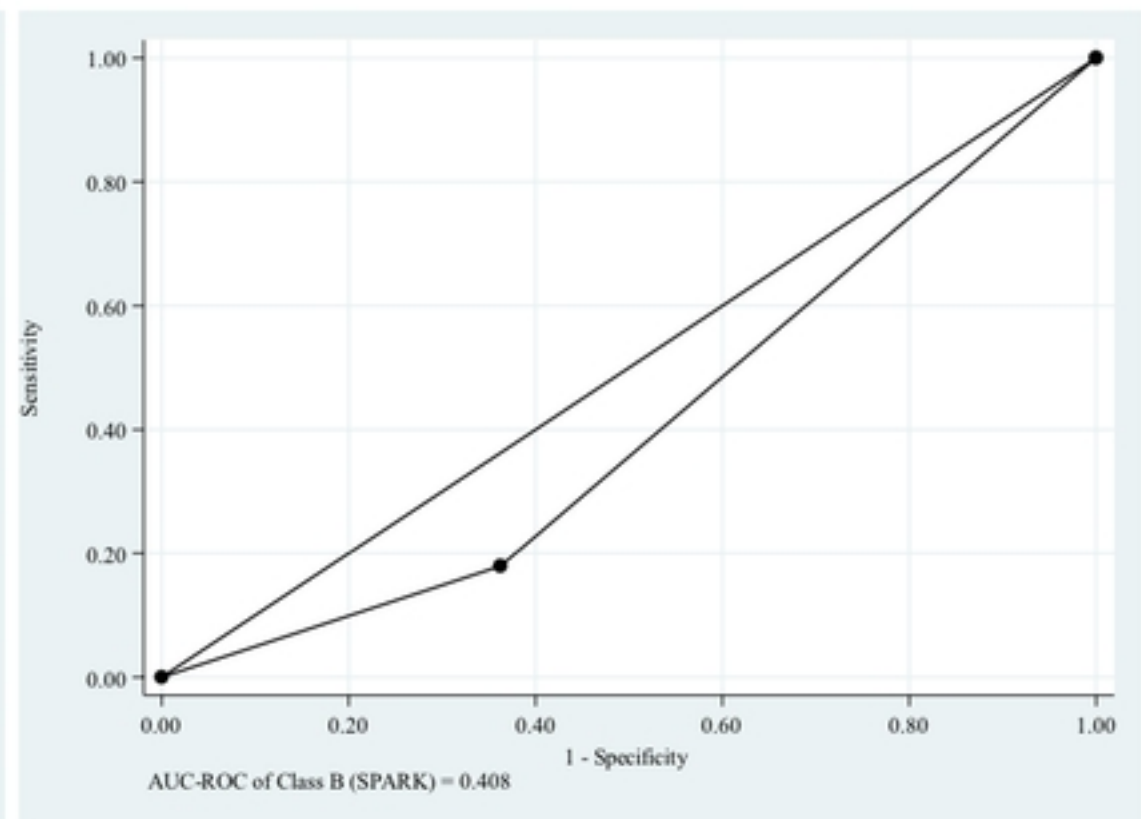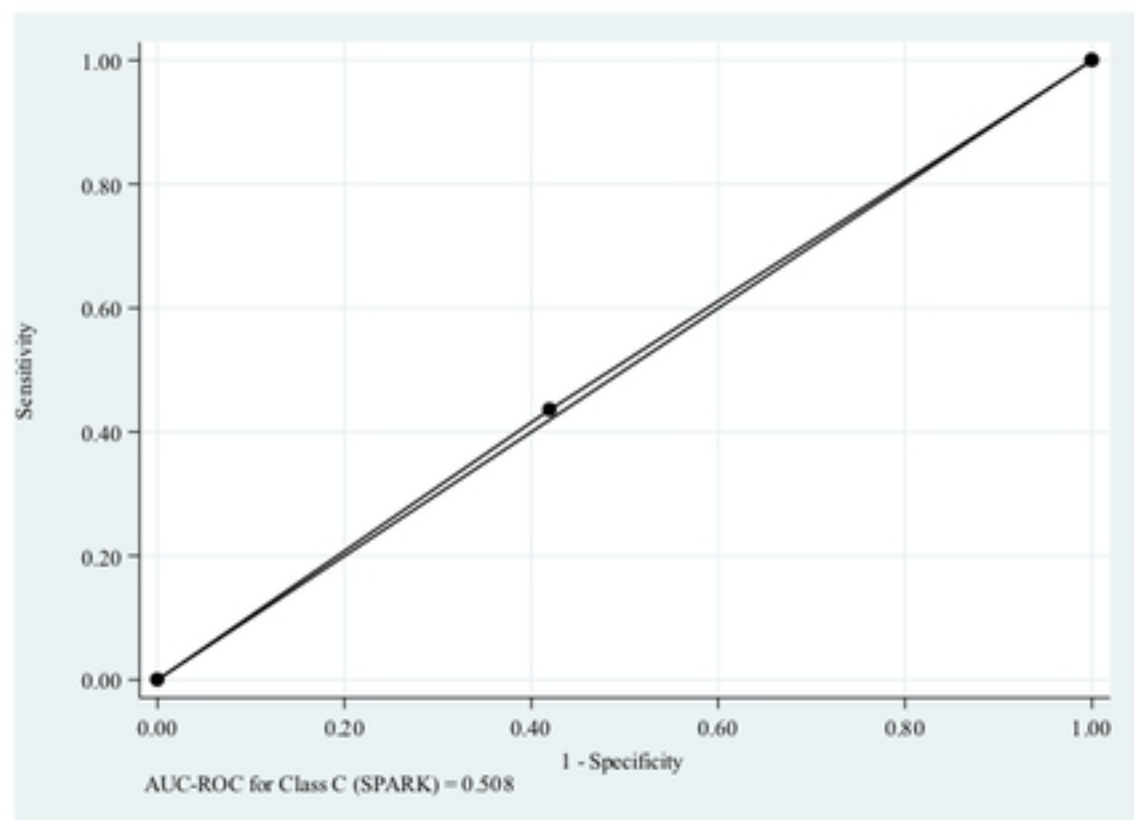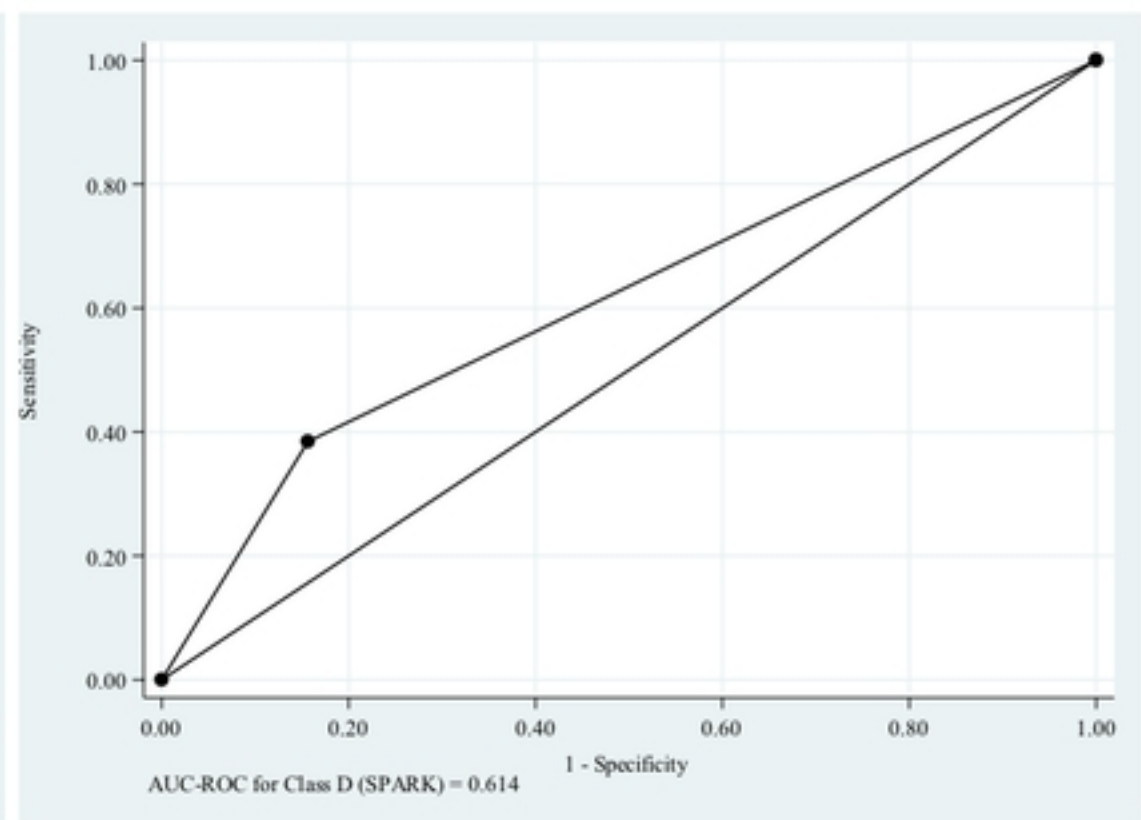

medRxiv preprint doi: <https://doi.org/10.1101/2022.03.31.22273255>; this version posted April 4, 2022. The copyright holder for this preprint (which was not certified by peer review) is the author/funder, who has granted medRxiv a license to display the preprint in perpetuity. It is made available under a [CC-BY 4.0 International license](https://creativecommons.org/licenses/by/4.0/).

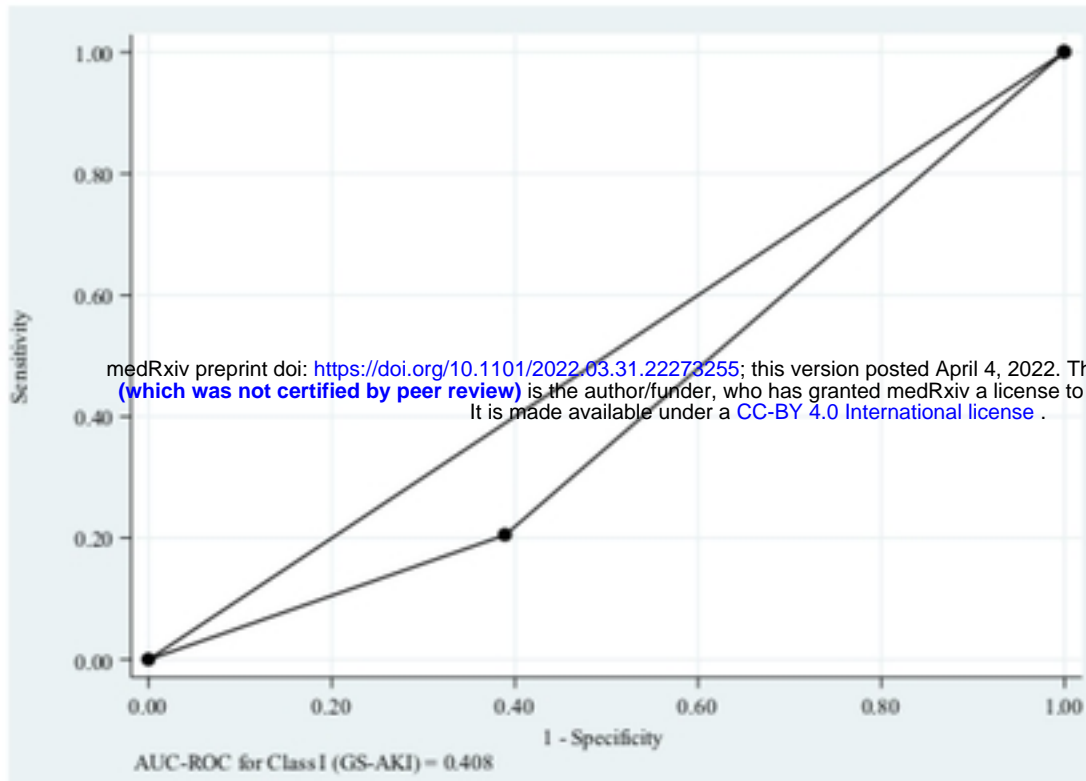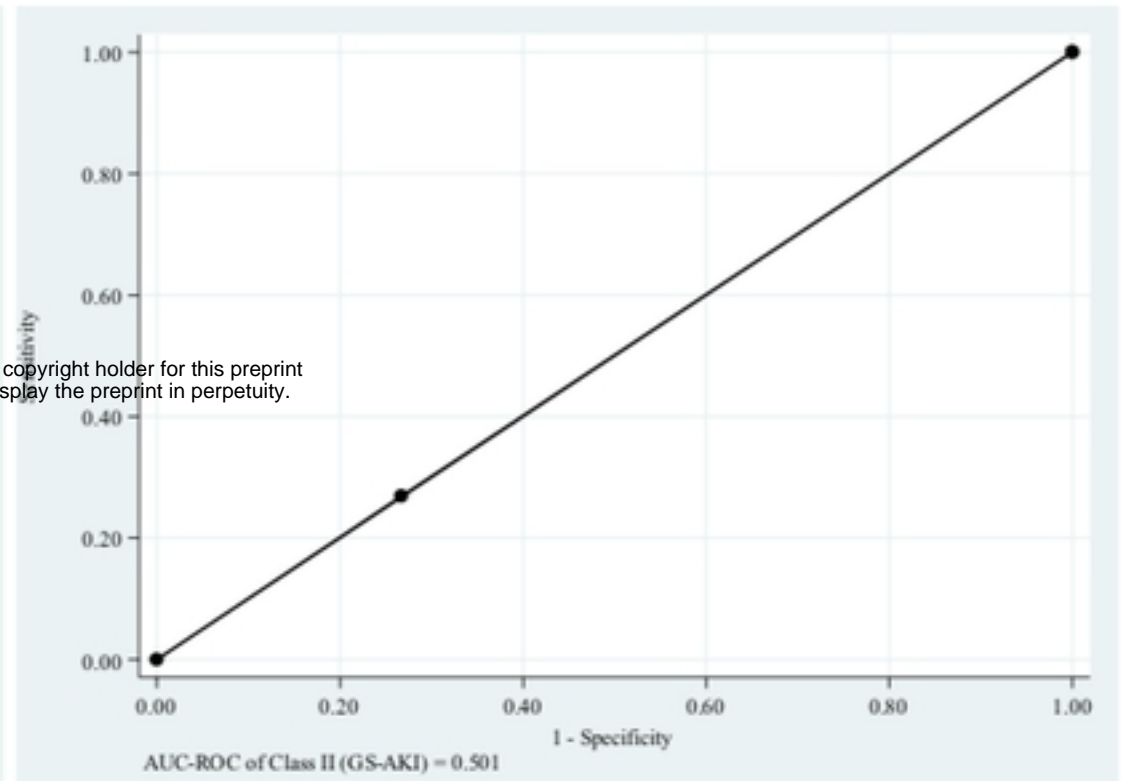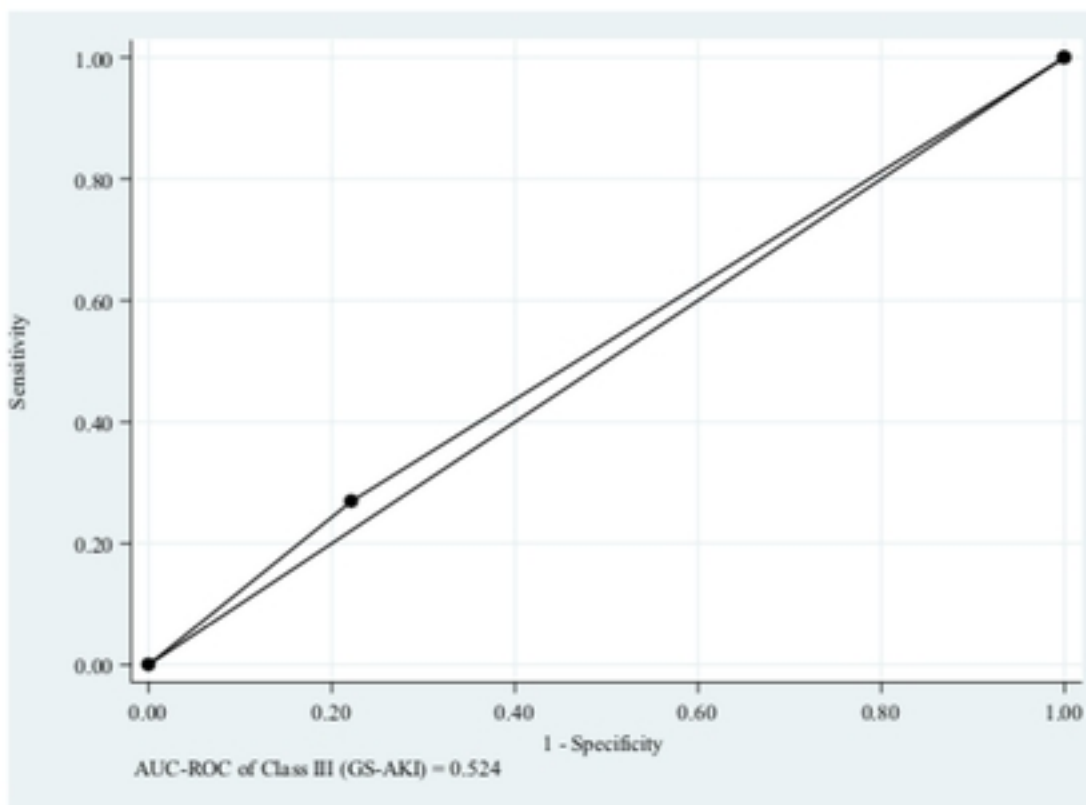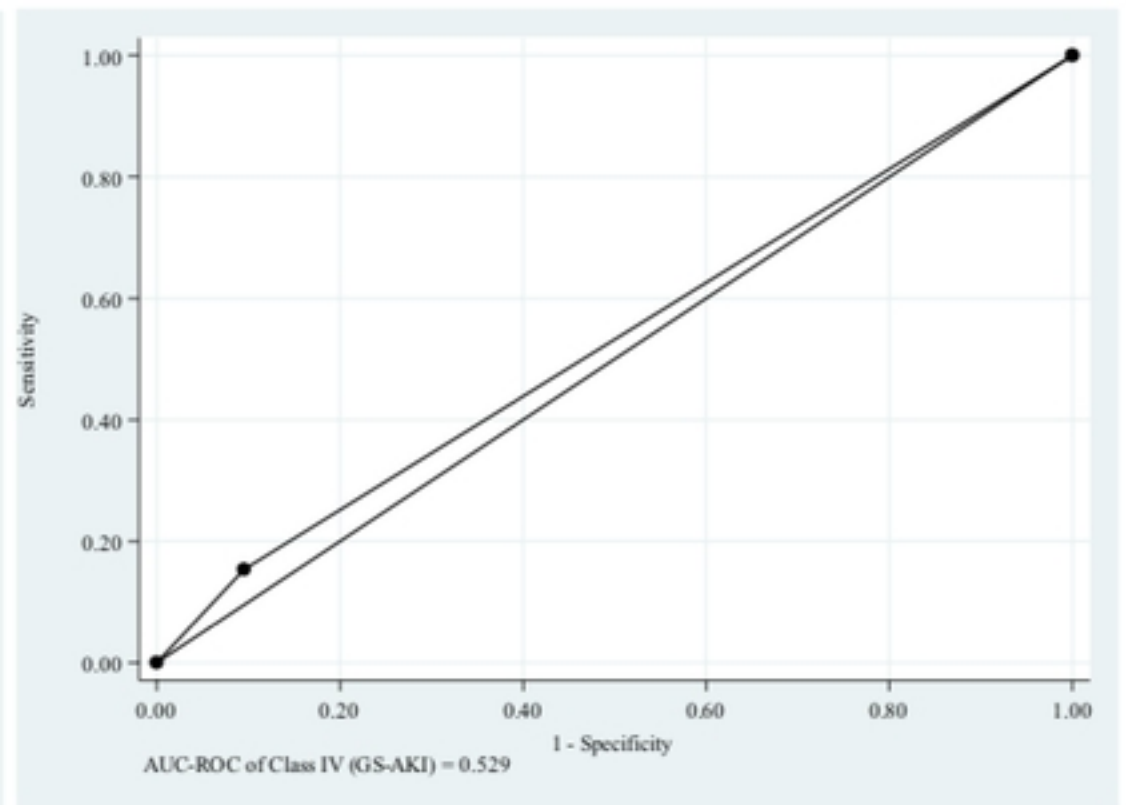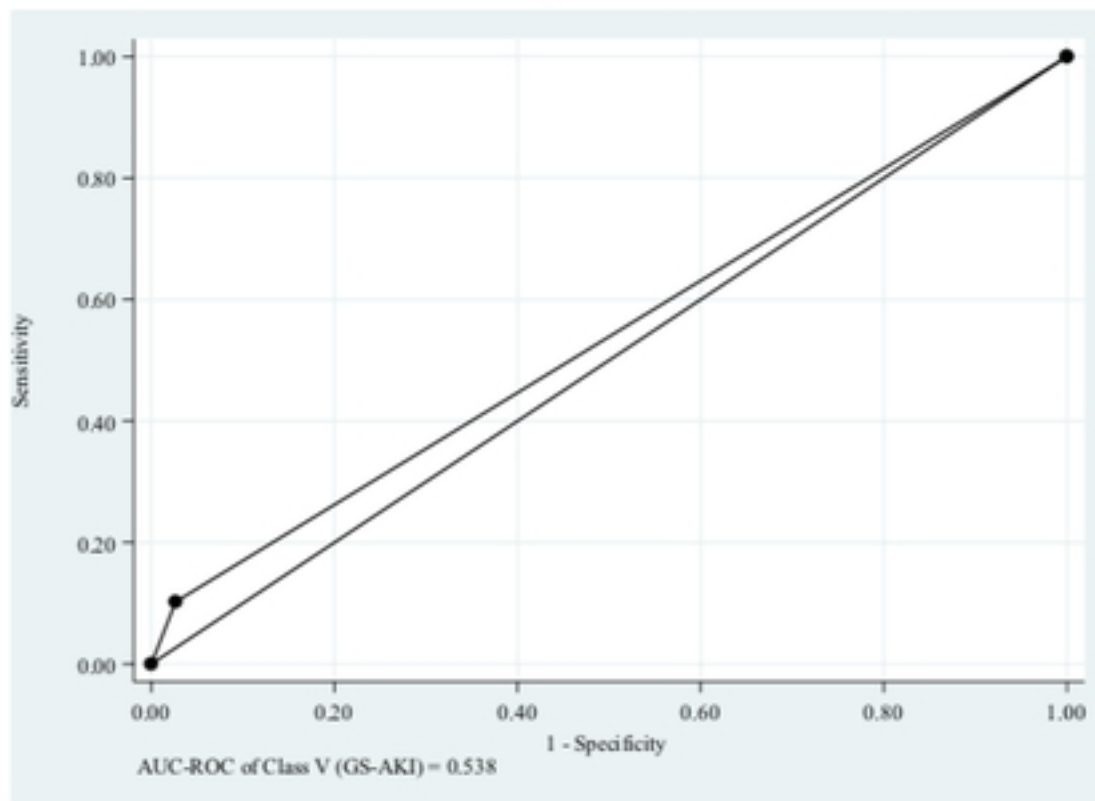

Source: https://medrxiv.org/content/10.1101/2022.03.31.22273255v1.full.pdf
